# Supplementary material for: Polyurethane Shape Memory Polymer/pH-Responsive Hydrogel Hybrid for Bi-Function Synergistic Actuations
Source: Gels. 2023 May 21;9(5):428. doi: 10.3390/gels9050428 (PMC10218152; doi:10.3390/gels9050428)
Supplement: Supplementary file 1 [file gels-09-00428-s001.zip]

Archive with 8 entries (8 files):
- Movie S1. The actuation of the í░Sí▒ shape actuator..mp4
- Movie S2. The actuation of the í░Mí▒ shape actuator..mp4
- Movie S3. The actuation of the spiral shape actuator..mp4
- Movie S4. The standing process of the folding table..mp4
- Movie S5. The capturing process of the paw-mimetic actuator..mp4
- Movie S6. The jacking up process of the pangolin-mimetic  actuator..mp4
- Movie S7. The hunting process of the octopus-mimetic actuator..mp4
- Revised Supporting information 1.pdf
